# Supplementary material for: The Complete Mitochondrial Genome of One Breeding Strain of Asian Swamp Eel (Monopterus albus, Zuiew 1793) Using PacBio and Illumina Sequencing Technologies and Phylogenetic Analysis in Synbranchiformes
Source: MDPI journal article supplement (doi:10.3390/genes12101567), 2021-10-01
Supplement: s1 [file s1]

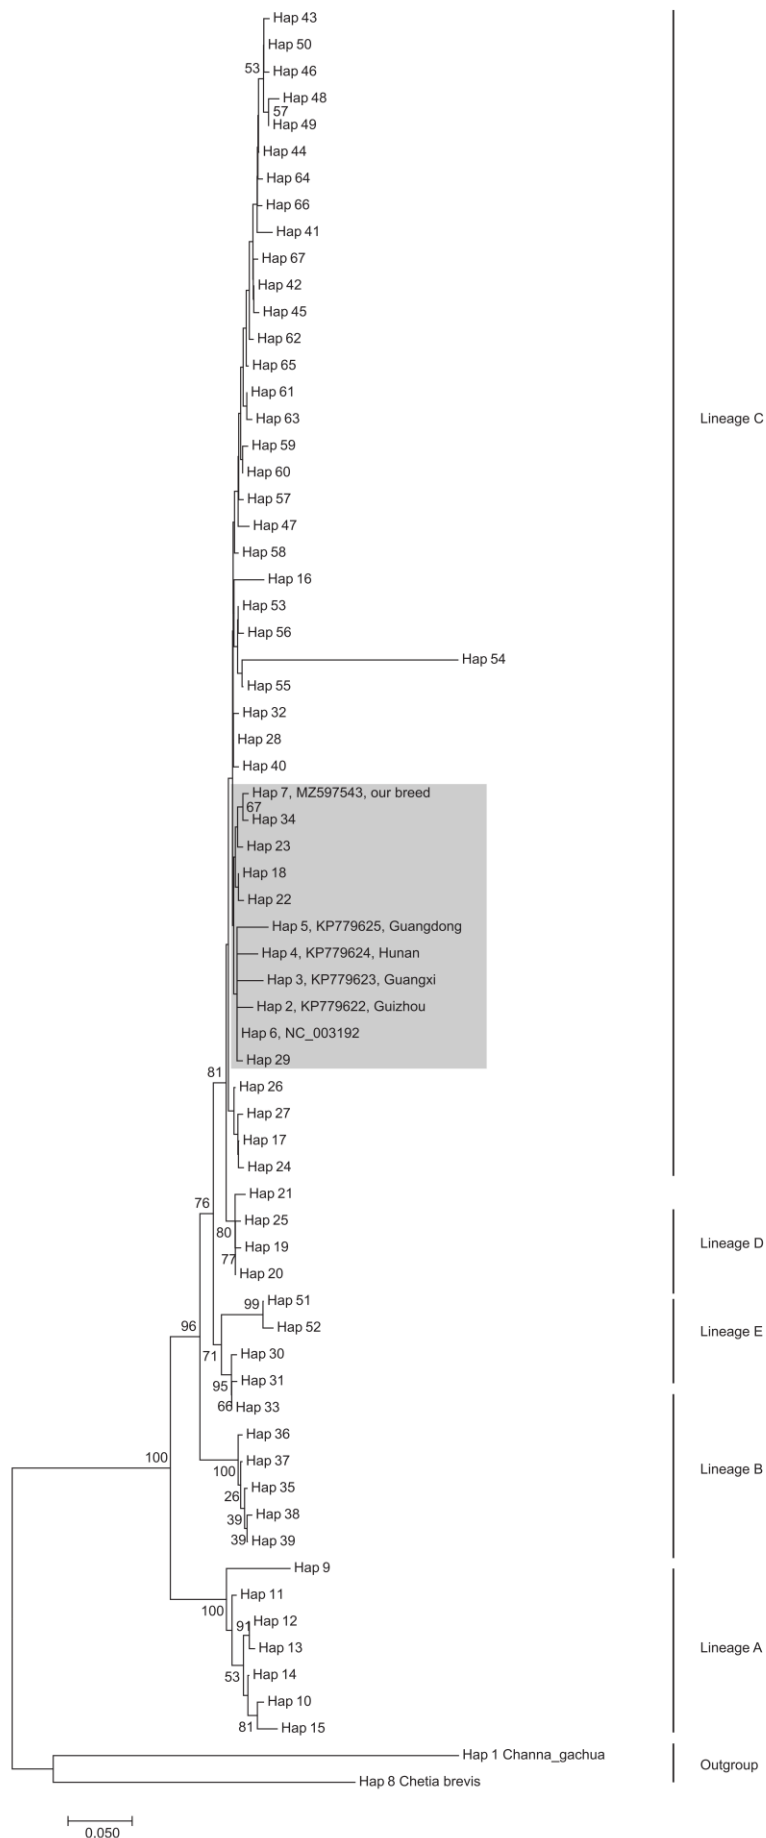

Figure S3: The neighbour-joining tree of the phylogenetic relationships among 67 haplotypes of D-loop of our breed (MZ597543) and wild swamp eel species from China based on p-distances. Table S1: Nucleotide composition and skewness levels calculated for sequenced majority strand of the mitogenomes of *M. albus*.
