# Supplementary material for: The Complete Mitochondrial Genome of One Breeding Strain of Asian Swamp Eel (Monopterus albus, Zuiew 1793) Using PacBio and Illumina Sequencing Technologies and Phylogenetic Analysis in Synbranchiformes
Source: MDPI journal article supplement (doi:10.3390/genes12101567), 2021-10-01
Supplement: s1 [file s1]

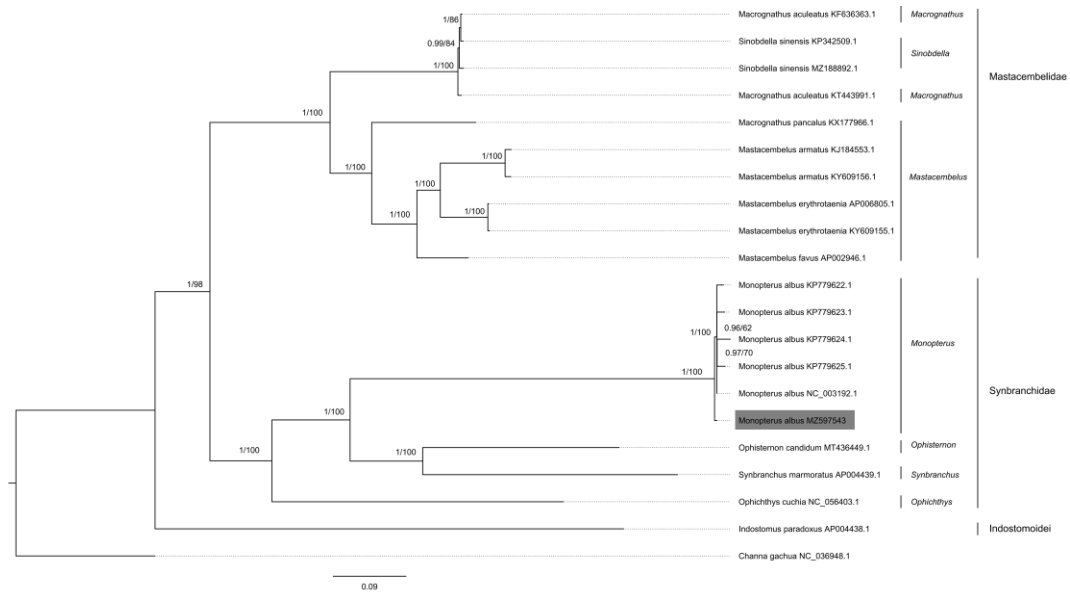

Figure S2: The phylogenetic tree of order Synbranchiformes inferred from the concatenated 13 PCGs, 2 rRNAs, 22 tRNAs and one D-loop of 20 complete mitochondrial sequence obtained using MrBayes v.3.2.6 and IQ-TREE v.1.5.5. *Channa gachua* (NC\_036948.1) was used as outgroup.
