# Supplementary material for: The Complete Mitochondrial Genome of One Breeding Strain of Asian Swamp Eel (Monopterus albus, Zuiew 1793) Using PacBio and Illumina Sequencing Technologies and Phylogenetic Analysis in Synbranchiformes
Source: MDPI journal article supplement (doi:10.3390/genes12101567), 2021-10-01
Supplement: s1 [file s1]

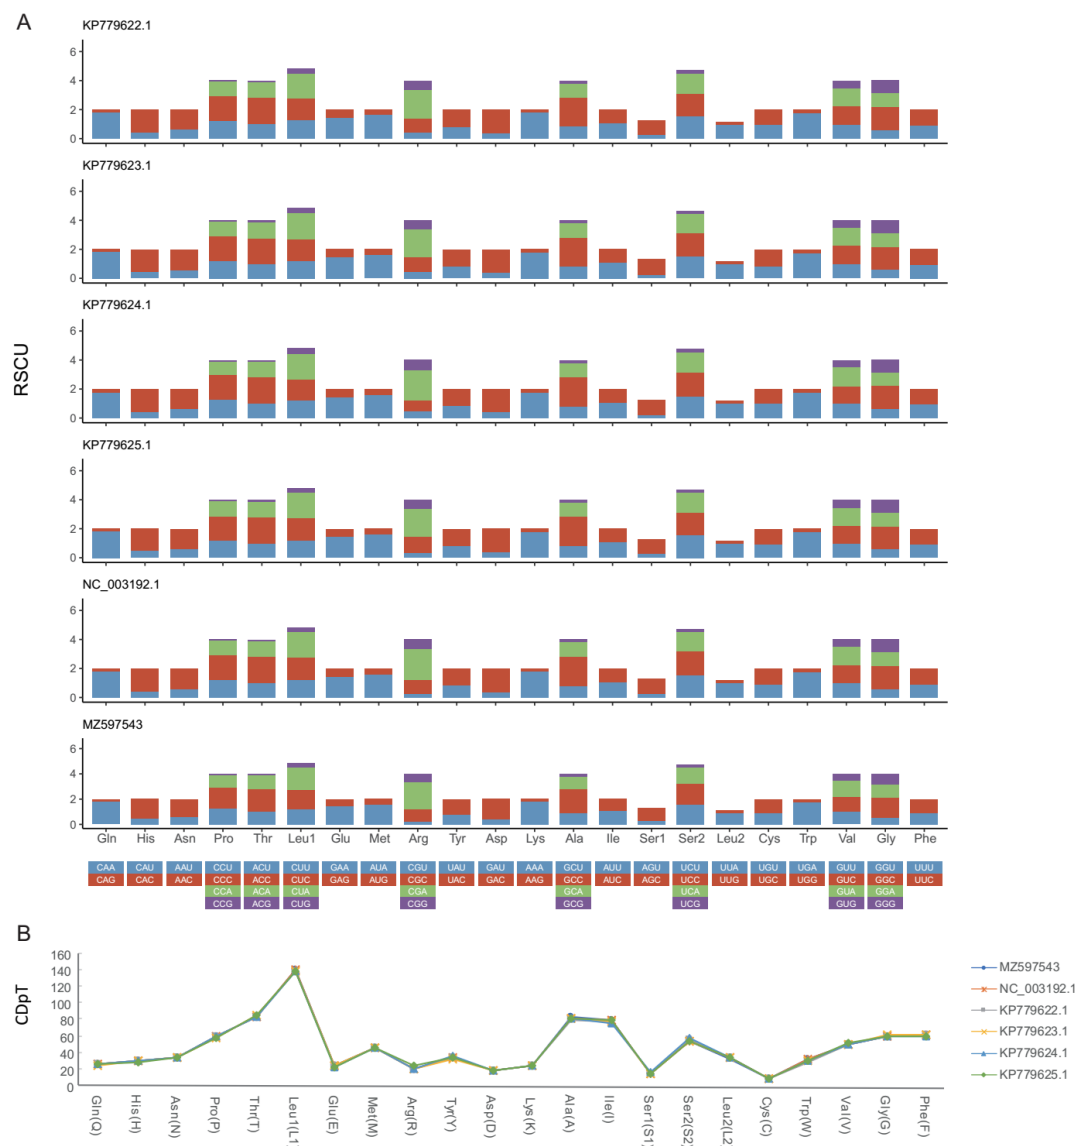

Figure S1: Codon frequency and RSCU (relative synonymous codon usage) in the mitogenomes of selecting breed, and the other five ones of *M. albus* sampled from different sites.
