# Supplementary material for: The Complete Mitochondrial Genome of One Breeding Strain of Asian Swamp Eel (Monopterus albus, Zuiew 1793) Using PacBio and Illumina Sequencing Technologies and Phylogenetic Analysis in Synbranchiformes
Source: MDPI journal article supplement (doi:10.3390/genes12101567), 2021-10-01
Supplement: s1 [file s1]

**Table S1.** Nucleotide composition and skewness levels calculated for sequenced majority strand of the six mitogenomes of *Monopterus albus*

| Region(s)/Genes              | Size(bp) | Nucleotides Composition |      |      |      |      |      | AT-Skew | GC-Skew |
|------------------------------|----------|-------------------------|------|------|------|------|------|---------|---------|
|                              |          | A                       | T    | G    | C    | A+T  | G+C  |         |         |
| MZ597543, selecting breed    |          |                         |      |      |      |      |      |         |         |
| Whole mitogenome             | 16621    | 28.9                    | 27.1 | 14.5 | 29.5 | 56   | 44   | 0.032   | -0.341  |
| PCGs                         | 10899    | 26.5                    | 28.4 | 13.5 | 31.6 | 54.9 | 45.1 | -0.034  | -0.403  |
| 1st condon positions         | 3633     | 28.5                    | 21.4 | 22.2 | 27.9 | 49.9 | 50.1 | 0.141   | -0.113  |
| 2nd condon positions         | 3633     | 28.1                    | 40.3 | 18.9 | 12.7 | 59.2 | 40.8 | -0.362  | -0.379  |
| 3rd condon positions         | 3633     | 32.2                    | 23.5 | 5.5  | 38.9 | 55.7 | 44.4 | 0.157   | -0.753  |
| tRNAs                        | 983      | 32                      | 27.1 | 18.1 | 22.8 | 59.1 | 40.9 | 0.084   | -0.114  |
| rRNAs                        | 2621     | 34.4                    | 22.6 | 18.6 | 24.4 | 57   | 43   | 0.206   | -0.136  |
| KP779622.1, Guizhou province |          |                         |      |      |      |      |      |         |         |
| Whole mitogenome             | 16622    | 28.8                    | 27.2 | 14.5 | 29.5 | 56   | 44   | 0.029   | -0.342  |
| PCGs                         | 10902    | 26.5                    | 28.5 | 13.4 | 31.6 | 55   | 45   | -0.038  | -0.405  |
| 1st condon positions         | 3634     | 28.5                    | 21.6 | 22   | 27.9 | 50.1 | 49.9 | 0.137   | -0.12   |
| 2nd condon positions         | 3634     | 19.1                    | 40.1 | 12.6 | 28.2 | 59.2 | 40.8 | -0.355  | -0.382  |
| 3rd condon positions         | 3634     | 31.8                    | 23.9 | 5.6  | 38.7 | 55.7 | 44.3 | 0.142   | -0.748  |
| tRNAs                        | 985      | 32.3                    | 27   | 18   | 22.7 | 59.3 | 40.7 | 0.089   | -0.117  |
| rRNAs                        | 2625     | 34.4                    | 22.6 | 18.5 | 24.5 | 57   | 43   | 0.206   | -0.138  |
| KP779623.1, Guangxi province |          |                         |      |      |      |      |      |         |         |
| Whole mitogenome             | 16622    | 28.9                    | 27.1 | 14.5 | 29.4 | 56   | 43.9 | 0.032   | -0.339  |
| PCGs                         | 10902    | 26.6                    | 28.4 | 13.5 | 31.4 | 55   | 44.9 | -0.033  | -0.398  |
| 1st condon positions         | 3634     | 28.7                    | 21.5 | 22.2 | 27.6 | 50.2 | 49.8 | 0.145   | -0.107  |
| 2nd condon positions         | 3634     | 19                      | 40.3 | 12.7 | 28   | 59.3 | 40.7 | -0.36   | -0.376  |
| 3rd condon positions         | 3634     | 32.1                    | 23.4 | 5.7  | 38.7 | 55.5 | 44.4 | 0.156   | -0.743  |
| tRNAs                        | 983      | 32.1                    | 27.1 | 18   | 22.8 | 59.2 | 40.8 | 0.086   | -0.117  |
| rRNAs                        | 2622     | 34.3                    | 22.6 | 18.3 | 24.8 | 56.9 | 43.1 | 0.206   | -0.15   |
| KP779624.1, Hunan province   |          |                         |      |      |      |      |      |         |         |
| Full genome                  | 16622    | 28.8                    | 27.2 | 14.5 | 29.5 | 56   | 44   | 0.028   | -0.342  |
| PCGs                         | 10902    | 26.4                    | 28.6 | 13.5 | 31.6 | 55   | 45.1 | -0.04   | -0.402  |
| 1st codon position           | 3634     | 28.2                    | 22   | 21.9 | 27.9 | 50.2 | 49.8 | 0.124   | -0.121  |

|                                |       |      |      |      |      |      |      |        |        |
|--------------------------------|-------|------|------|------|------|------|------|--------|--------|
| 2nd codon position             | 3634  | 19.1 | 40   | 12.6 | 28.4 | 59.1 | 41   | -0.354 | -0.386 |
| 3rd codon position             | 3634  | 31.9 | 23.8 | 6    | 38.4 | 55.7 | 44.4 | 0.146  | -0.731 |
| tRNAs                          | 983   | 32   | 27.2 | 18   | 22.8 | 59.2 | 40.8 | 0.082  | -0.117 |
| rRNAs                          | 2622  | 34.5 | 22.6 | 18.3 | 24.6 | 57.1 | 42.9 | 0.209  | -0.146 |
| KP779625.1, Guangdong province |       |      |      |      |      |      |      |        |        |
| Full genome                    | 16622 | 28.9 | 27.2 | 14.6 | 29.4 | 56.1 | 44   | 0.03   | -0.337 |
| PCGs                           | 10902 | 26.5 | 28.5 | 13.6 | 31.4 | 55   | 45   | -0.037 | -0.396 |
| 1st codon position             | 3634  | 28.6 | 21.5 | 22.1 | 27.8 | 50.1 | 49.9 | 0.143  | -0.116 |
| 2nd codon position             | 3634  | 18.9 | 40.2 | 12.9 | 28   | 59.1 | 40.9 | -0.361 | -0.368 |
| 3rd codon position             | 3634  | 32   | 23.8 | 5.8  | 38.4 | 55.8 | 44.2 | 0.146  | -0.74  |
| tRNAs                          | 983   | 32.3 | 26.9 | 18   | 22.8 | 59.2 | 40.8 | 0.093  | -0.117 |
| rRNAs                          | 2622  | 34.4 | 22.6 | 18.5 | 24.6 | 57   | 43.1 | 0.207  | -0.141 |
| NC_003192.1, unknown           |       |      |      |      |      |      |      |        |        |
| Full genome                    | 16622 | 28.9 | 27.2 | 14.5 | 29.5 | 56.1 | 44   | 0.031  | -0.341 |
| PCGs                           | 10899 | 26.5 | 28.5 | 13.4 | 31.6 | 55   | 45   | -0.036 | -0.403 |
| 1st codon position             | 3633  | 28.5 | 21.5 | 22.2 | 27.8 | 50   | 50   | 0.139  | -0.111 |
| 2nd codon position             | 3633  | 18.9 | 40.3 | 12.7 | 28.1 | 59.2 | 40.8 | -0.362 | -0.378 |
| 3rd codon position             | 3633  | 32.1 | 23.6 | 5.4  | 38.8 | 55.7 | 44.2 | 0.153  | -0.755 |
| tRNAs                          | 983   | 32.1 | 27.1 | 18   | 22.8 | 59.2 | 40.8 | 0.086  | -0.117 |
| rRNAs                          | 2622  | 34.4 | 22.5 | 18.5 | 24.5 | 56.9 | 43   | 0.209  | -0.14  |
